# Supplementary material for: Ag nanoparticle decorated MnO2flakes as flexible SERS substrates for rhodamine 6G detection
Source: Royal Society of Chemistry journal article supplement (doi:10.1039/c8ra07778a), 2018-01-01

## Supplementary Information

**Fig. S1** The SEM images of Al foil, the insert is the digital image.

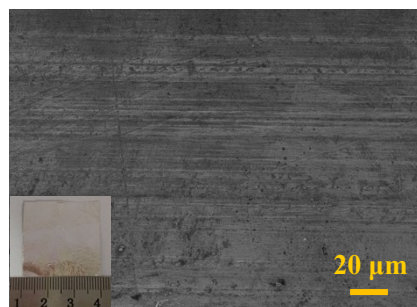

**Fig. S2** The Cross-section SEM image of the Al@MnO<sub>2</sub> prepared at 18 h.

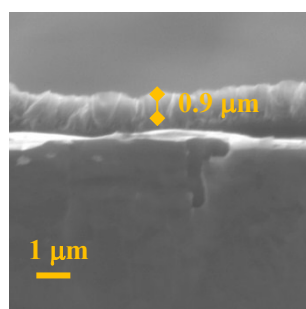

Supplement: c8ra07778a1.pdf [file c8ra07778a1.pdf]
